# Supplementary material
Source: Springer Nature journal article supplement (https://www.springermedizin.de/resource/supplementary/12950_2009_158_MOESM1_ESM.pdf/9558084)

Survival rate (%)

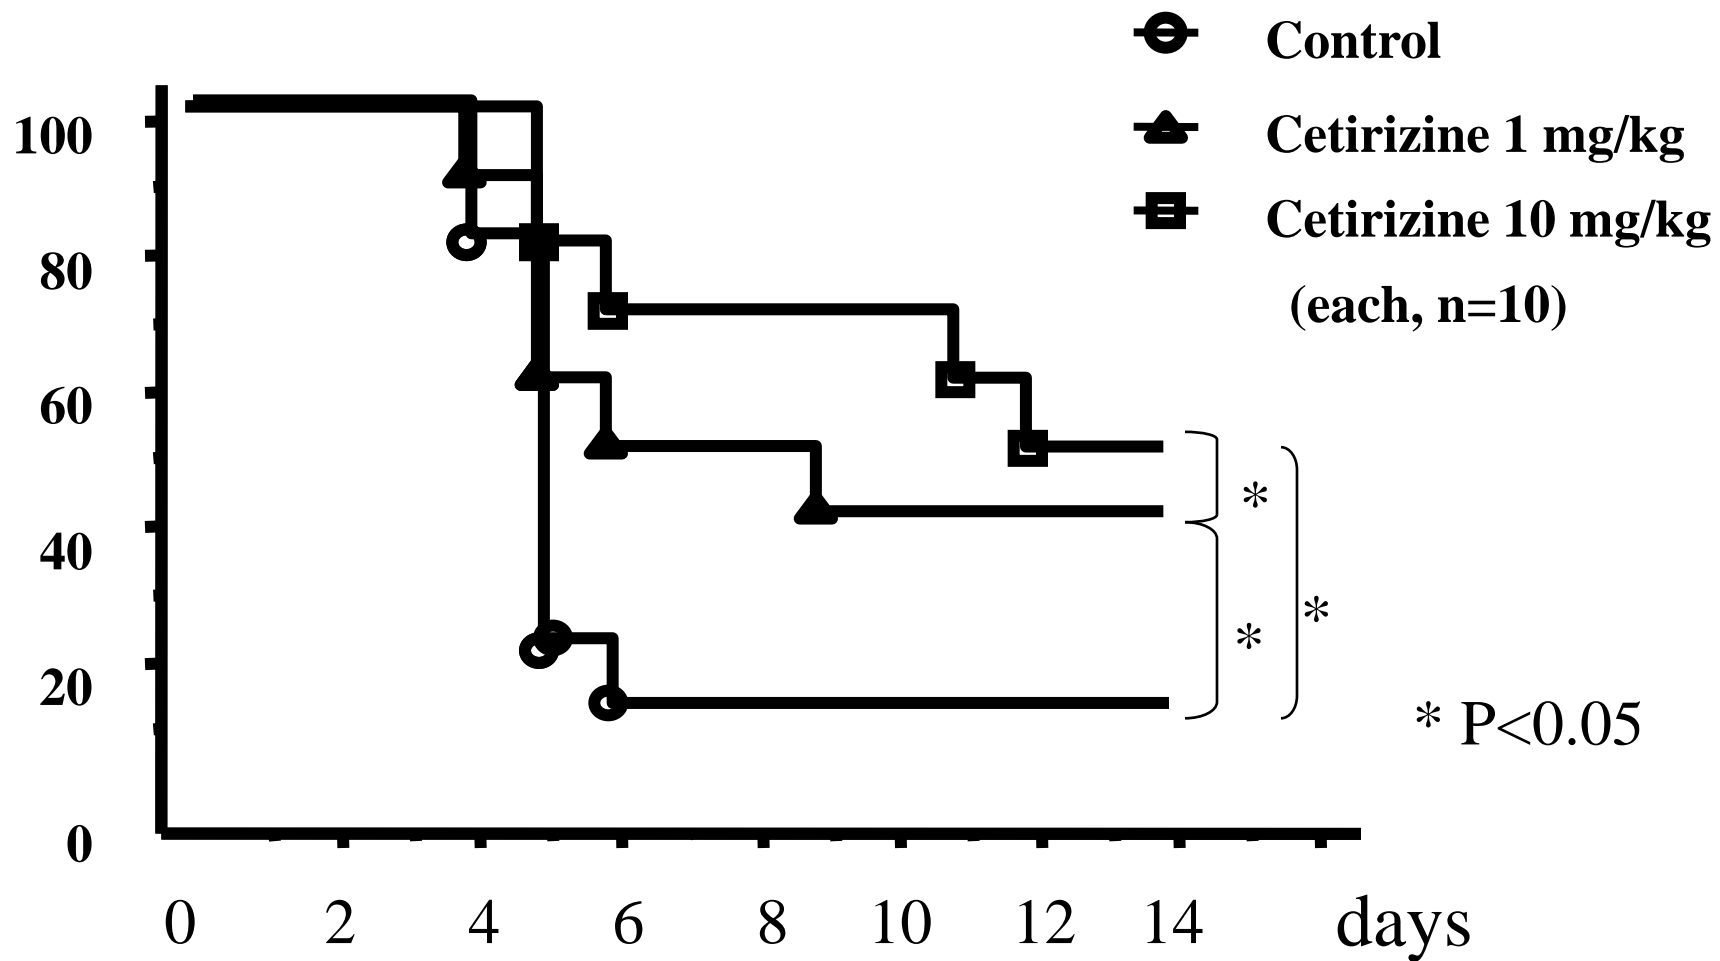

Supplement: MOESM1 [file 9558084]
